# Supplementary material for: De haalbaarheid van een gecombineerde leefstijlinterventie (GLI-GGZ) bij patiënten met stemmings- en/of angststoornissen
Source: Springer Nature journal article supplement (doi:10.1007/s12508-021-00319-6), 2021-11-01
Supplement: MOESM2 [file 19880964]

**Bijlage B - Resultaten evaluatielijst GLI-GGZ juni 2017 per vraag**

*Losse opmerkingen over dagboekje:*

- Structurerend
- geeft bewustwording/inzicht
- confronterend

Indien ja *(4/6)*:

- Meer theorie over voeding
- Samen koken om recepten volgens de gegeven richtlijnen uit te proberen
- Thema ‘mildheid’ ook meenemen in training & thema ‘krachtbronnen’ meer aandacht geven in training
- Meer tijd om elkaars ervaring te horen

**18. Heeft u ongunstige effecten ervaren van het programma?**

- Meer stress (vooral in begin) door o.a. elkaar nog niet kennen/dingen ‘niet mogen’ (voeding)/ intensiteit programma *(combinatie antwoorden)*
- Begin wat meer geld uitgegeven *(1 respondent)*

**21. Wat is voor u het meest waardevolle element van deze training geweest?**

- Gecombineerd aanbod van de leefstijlonderdelen/totaalpakket
- Bewustwording samenhang lichaam/geest & invloed leefstijl op psychische klachten
- In groepsverband werken zorgt voor motivatie, inspiratie, steun en gezelligheid
- Inzicht dat beweging niet per se een sport hoeft te zijn of veel tijd moet kosten
- Meerdere trainers met allen eigen specialisatie
- Ruimte voor eigen invulling qua toepassing onderdelen

**22. Heeft u nog algemene aanvullingen op of verbeterpunten voor deze training?**

- Meer duidelijkheid vooraf/brief vóór training met data + wat je mee moet nemen
- Kennismaking met groep voor start training
- Tussendoor 1 x individueel gesprek
- Samen koken i.p.v. hapjes meenemen (gaf stress)
- of direct benadrukken dat eten meenemen voor anderen niet per se hoeft
- of handouts geven met recepten aan begin training
- Minder diep ingaan om materie (voeding), was soms te complex
- In begin te weinig tijd voor voedingsonderdeel
- Theorie voeding meer gestructureerd aanbieden tijdens bijeenkomst, dus via presentatie bv ipv alleen aan de hand van vragen die opkomen in groep
- Opbouw meer faseren: informatie per onderdeel meer uitspreiden zodat het niet zo veel is en je minder ‘moet’ per keer + dit maakt de herhalende opbouw ‘spannender’
- Terugkerende opdrachten in werkboek iets aanpassen zodat ze niet telkens exact hetzelfde zijn
- Meer tijd om dieper in te gaan op elkaars ervaring
